# Supplementary material for: Impact of Experimentally Induced Cognitive Dietary Restraint on Eating Behavior Traits, Appetite Sensations, and Markers of Stress during Energy Restriction in Overweight/Obese Women
Source: Hindawi journal article supplement (doi:10.1155/2018/4259389), 2018-06-25
Supplement: f1 [file 4259389.f1.pdf]

**Table S.1:** The 7-day cyclic menu used during the controlled diet intervention

| Meals            | Monday                      | Tuesday               | Wednesday                      | Thursday                        | Friday                         | Saturday                        | Sunday                                    |
|------------------|-----------------------------|-----------------------|--------------------------------|---------------------------------|--------------------------------|---------------------------------|-------------------------------------------|
| <b>Breakfast</b> | Müslix cereal               | Whole grain bread     | Raisin bran muffin             | Whole wheat bread and margarine | Müslix cereal                  | Whole wheat bread and margarine | Ham and cheese whole wheat english muffin |
|                  | Milk                        | Cottage cheese        | Strawberry and orange smoothie | Hard boiled egg                 | Milk                           | Omelet                          | Cantaloupe                                |
|                  | Honey dew melon             | Cantaloupe            | Mozzarella cheese              | Honeydew melon                  | Pineapple                      | Green grapes                    | Grapefruit juice                          |
|                  | Almonds                     | Peanut butter and jam |                                | Strawberry yogurt               | Almonds                        | Jalsberg cheese                 | Strawberry yogurt                         |
| <b>Lunch</b>     | Shrimp rice                 | Shepherd's pie        | BBQ chicken                    | Ham sandwich                    | Frittata                       | Mushroom chicken                | Chilli con carne                          |
|                  | Green salad and vinaigrette | Green beans           | Peppers and zucchini           | Coleslaw                        | Green salad and vinaigrette    | Green beans                     | Raw vegetables                            |
|                  | Red grapes                  | Lentil soup           | Rosted root vegetables         | Vegetable juice                 | Whole wheat bread              | Roasted potatoes                | Ranch dip                                 |
|                  |                             | Apple and raisin cake | Leek cream                     | Apple sauce                     | Vegetable soup                 | Orange                          | Couscous                                  |
|                  |                             |                       | Fruit salad                    |                                 | Fruit salad                    |                                 | Apple and berry sauce                     |
| <b>Dinner</b>    | Chicken cacciatore          | Tuna pasta            | Greek tilapia                  | Pasta primavera                 | Salmon loaf                    | Veal meatball and vegetables    | Pork                                      |
|                  | Brocoli                     | Vegetable salad       | Carrot                         | White kidney bean salad         | Bechamel sauce                 | Tomato soup                     | Green peas                                |
|                  | Carrot soup                 | Pear                  | Spinach salad                  | Kiwi                            | Broccoli and cauliflower salad | Brown rice                      | Basmati rice                              |
|                  | Roasted potatoes            |                       | Bulgur                         |                                 | Vegetables and lemon orzo      | Raspberry cake                  | Cauliflower soup                          |
|                  | Vanilla pudding             |                       | Green grapes                   |                                 | Date squares                   |                                 | Blueberry pudding                         |
